# Supplementary material for: P53-dependent hypusination of eIF5A affects mitochondrial translation and senescence immune surveillance
Source: PubMed Central journal article supplement (PMC11358140; doi:10.1038/s41467-024-51901-w), 2024-08-28
Supplement: 41467_2024_51901_MOESM3_ESM.pdf [file 41467_2024_51901_MOESM3_ESM.pdf]

## **Description of Additional Supplementary Files**

**Supplementary Data 1:** Results of the OP-Puro based screen in OIS BJ-Ras-ER

**Supplementary Data 2:** Results of the whole proteome analysis in proliferating BJ-Ras-ER

**Supplementary Data 3:** Results of the whole proteome analysis in OIS BJ-Ras-ER

**Supplementary Data 4:** eIF5A tripeptide motifs present in mitochondrial and cytosolic ribosomal proteins

**Supplementary Data 5:** Oligonucleotides used in this study
